# Supplementary material
Source: Research Square preprint supplement (doi:10.21203/rs.3.rs-9601090/v1)
Supplement: Supplementary file 1 [file f2471dcc09825d8a8b9bd47e.docx]

**Table (1): Nutritional comparison of the peptide-based (100% whey) formula and casein-based polymeric formula**

| **Formula Analysis per 100 mL** | **Peptide-based (Partially Hydrolyzed) Formula** | **Casein-based Formula** |
| --- | --- | --- |
| **Energy, kcal** | 100 | 100 |
| **Protein, g** | 3 | 3 |
| **Type** | Peptides | Whole |
| **Source** | 100% whey | 82% casein  18% whey |
| **Carbohydrate, g** | 13.8 | 11.0 |
| **Source** | Maltodextrin (corn), sucrose, starch | Maltodextrin (corn), sucrose |
| **Fat, g** | 3.9 | 5 |
| **LCT, %** | 40 | 80 |
| **Source** | Soya oil, high oleic sunflower oil, soya lecithin | High oleic sunflower oil, soya oil |
| **MCT, %** | 60 | 20 |
| **Fiber** | 0 | 0 |
| **Osmolality, mOsm/kg water** | 380 | 350 |

**Table (2): Comparison of the two groups in terms of baseline characteristics, anthropometrics and oro-pharyngeal dysfunction symptoms**

|  | **Group A**  **No. = 17** | **Group B**  **No. = 17** | **P value** |
| --- | --- | --- | --- |
| **Age (years)** | | | |
| **Range** | **2 - 13** | **2 - 12** | **0.628** |
| **Mean ± SD** | **4.1 ± 3.1** | **4.7 ± 3.4** |
| **Median (IQR)** | **3 (2.5 - 4)** | **3 (2.6 - 5)** |
| **Gender** | | | |
| **Male** | **6 (35.3)** | **12 (70.6)** | **0.084** |
| **Female** | **11 (64.7)** | **5 (29.4)** |
| **Muscle tone** | | | |
| **Normal** | **0 (0)** | **1 (5.9)** | **0.595** |
| **Flaccid** | **3 (17.6)** | **3 (17.6)** |
| **Spastic** | **14 (82.4)** | **13 (76.5)** |
| **Indication for tube feeding** | | | |
| **Unsafe swallow** | **7 (41.2)** | **8 (47.1)** | **0.730** |
| **Failure to thrive** | **16 (94.1)** | **15 (88.2)** | **1.000** |
| **Prolonged feeding time** | **7 (41.2)** | **8 (47.1)** | **0.730** |
| **Weight (kg)** | | | |
| **Range** | **5.2 - 13** | **6 - 18** | **0.468** |
| **Mean ± SD** | **8.2 ± 2.1** | **9.1 ± 3.2** |
| **Median (IQR)** | **7.5 (6.7 - 9)** | **8 (7 - 9)** |
| **Weight for age (percentile)** | | | |
| **< 5th** | **9 (52.9)** | **9 (52.9)** | **1.000** |
| **5th -10th** | **6 (35.3)** | **6 (35.3)** |
| **10th -25th** | **2 (11.8)** | **2 (11.8)** |
| **Stature (cm)** | | | |
| **Range** | **60 - 95** | **61 - 102** | **0.959** |
| **Mean ± SD** | **74.4 ± 10.6** | **74.6 ± 11.2** |
| **Median (IQR)** | **71 (67 - 83)** | **72 (67 - 82)** |
| **Stature for age (percentile)** | | | |
| **< 5th** | **2 (11.8)** | **4 (23.5)** | **0.347** |
| **5th -10th** | **5 (29.4)** | **7 (41.2)** |
| **10th -25th** | **7 (41.2)** | **3 (17.6)** |
| **25th -50th** | **1 (5.9)** | **3 (17.6)** |
| **50th -75th** | **1 (5.9)** | **0 (0)** |
| **75th -90th** | **1 (5.9)** | **0 (0)** |
| **BMI** | | | |
| **Range** | **11.2 - 20.2** | **12.7 - 21** | **0.179** |
| **Mean ± SD** | **14.9 ± 2.6** | **16 ± 2** |
| **Median (IQR)** | **14.9 (13.1 - 16.6)** | **15.8 (15 - 17.3)** |
| **BMI (percentile)** | | | |
| **< 5th** | **3 (17.6)** | **1 (5.9)** | **0.198** |
| **5th -10th** | **1 (5.9)** | **2 (11.8)** |
| **10th -25th** | **6 (35.3)** | **1 (5.9)** |
| **25th -50th** | **3 (17.6)** | **8 (47.1)** |
| **50th -75th** | **3 (17.6)** | **4 (23.5)** |
| **75th -90th** | **1 (5.9)** | **1 (5.9)** |
| **Oro-pharyngeal dysfunction** | | | |
| **Poor Swallowing** | **17 (100)** | **15 (88.2)** | **0.485** |
| **Number of choking incidents while feeding (per week)** | | | |
| **0** | **3 (17.6)** | **5 (29.4)** | **0.185** |
| **1-2** | **6 (35.3)** | **9 (52.9)** |
| **≥ 3** | **8 (47.1)** | **3 (17.6)** |
| **Aspiration** | **12 (70.6)** | **11 (64.7)** | **0.714** |

**Table (3): Comparison between the two groups regarding percentage of improvement of anthropometrics**

|  | **Group A**  **No. = 17** | **Group B**  **No. = 17** | **P value** | **Sig.** |
| --- | --- | --- | --- | --- |
| **Weight (kg) % change** | | | | |
| **Range** | **28.6 – 63.5** | **22.2 – 60** | **0.031** | **S** |
| **Mean ± SD** | **47.2 ± 8.5** | **40.6 ± 10.7** |
| **Stature (cm) % change** | | | | |
| **Range** | **1.8 - 5.9** | **1.5 - 6.5** | **0.448** | **NS** |
| **Mean ± SD** | **3.7 ± 1.1** | **3.5 ± 1.4** |
| **BMI % change** | | | | |
| **Range** | **20.8 - 54.2** | **13.1 - 55.4** | **0.117** | **NS** |
| **Mean ± SD** | **37 ± 8.4** | **31.4 ± 12.2** |

**% of change equation = X 100**

**Table (4): Percentage of improvement of symptoms of oropharyngeal dysfunction in Group A and Group B**

|  | **Group A**  **No. = 17** | **Group B**  **No. = 17** | **P value** | **Sig.** |
| --- | --- | --- | --- | --- |
| **Swallowing improvement** | **10 (58.8%)** | **4 (23.5%)** | **0.037** | **S** |
| **Choking incidents improvement** | **11 (64.7%)** | **6 (35.3%)** | **0.086** | **NS** |
| **Aspiration improvement** | **11 (64.7%)** | **7 (41.2%)** | **0.169** | **NS** |
